# Supplementary material for: Time-related association between fluid balance and mortality in sepsis patients: interaction between fluid balance and haemodynamics
Source: PubMed Central journal article supplement (PMC6039532; doi:10.1038/s41598-018-28781-4), 2018-07-10
Supplement: 41598_2018_28781_MOESM1_ESM.pdf [file 41598_2018_28781_MOESM1_ESM.pdf]

**Time-related association between fluid balance and mortality in sepsis patients:**

**Interaction between fluid balance and haemodynamics**

Yanfei Shen<sup>1\*</sup>, Weizhe Ru<sup>2#</sup>, Xinmei Huang<sup>3</sup>, Weimin Zhang<sup>1</sup>

<sup>1</sup> Department of Intensive Care Unit, Dongyang People's Hospital, No. 60, Wuning West Road, Dongyang, Zhejiang, 322100, P.R. China

<sup>2</sup> Department of Oncology, Cixi People's Hospital, No. 999, Nanerhuan East Road, Hushan Street, Cixi, Zhejiang, 322100, P.R. China

<sup>3</sup> Department of otolaryngological, Jinhua TCM hospital, No. 439, Shuangxi West Road, Jinhua, Zhejiang, 322100, P.R. China

# Author Weizhe Ru contributed equally to this study and is listed as co-author

\* Corresponding author:

Yanfei Shen

Department of Intensive Care Unit, Dongyang People's Hospital,

No. 60, Wuning West Road, Dongyang, Zhejiang, 322100, P.R. China

Phone: +86-137-3890-3218

E-mail: snow.shen@hotmail.com

Table S1 Adjusted odds ratio of death using fluid balance within the first 24 hours as design variables in logistic models

| Variables                                                            | Odds ratio (95% CI)                | p       | Odds ratio (95% CI)        | p       |
|----------------------------------------------------------------------|------------------------------------|---------|----------------------------|---------|
| <b>Model 1</b>                                                       | Without Vasopressor-use (n = 6071) |         | Vasopressor-use (n = 2513) |         |
| <b>FB Q1</b>                                                         | 1                                  | -       | 1                          | -       |
| <b>FB Q2</b>                                                         | 1.05 (0.87 – 1.27)                 | 0.567   | 0.92 (0.69 – 1.22)         | 0.564   |
| <b>FB Q3</b>                                                         | 1.24 (1.03 – 1.50)                 | 0.022   | 1.15 (0.87 – 1.52)         | 0.302   |
| <b>FB Q4</b>                                                         | 1.32 (1.09 – 1.59)                 | 0.003   | 1.69 (1.29 – 2.22)         | < 0.001 |
| <b>SOFA on ICU admission</b>                                         | 1.14 (1.11 – 1.17)                 | < 0.001 | 1.13 (1.09 – 1.17)         | < 0.001 |
| <b>Urinary infection</b>                                             | 0.72 (0.62 – 0.83)                 | < 0.001 | 0.61 (0.49 – 0.76)         | < 0.001 |
| <b>Respiratory infection</b>                                         | 1.54 (1.33 – 1.77)                 | < 0.001 | 1.46 (1.20 – 1.78)         | < 0.001 |
| <b>Haemodialysis</b>                                                 | 1.26 (0.98 – 1.62)                 | 0.066   | 0.84 (0.60 – 1.17)         | < 0.001 |
| <b>Maximum serum creatinine</b>                                      | 1.05 (1.01 – 1.09)                 | 0.005   | 1.11 (1.05 – 1.17)         | < 0.001 |
| <b>Serum sodium on ICU admission (&lt; 135 mmol/L)</b>               | 1.31 (1.12 – 1.54)                 | < 0.001 | 1.52 (1.22 – 1.90)         | < 0.001 |
| <b>Platelet count on ICU admission (&lt; 150 * 10<sup>9</sup>/L)</b> | 1.18 (1.02 – 1.37)                 | 0.025   | 1.04 (0.83 – 1.29)         | 0.706   |
| <b>Serum calcium on ICU admission (&lt; 8 mg/dl)</b>                 | 0.84 (0.73 – 0.96)                 | 0.011   | 1.04 (0.84 – 1.27)         | 0.698   |

Abbreviations: CI, confidence interval; FB-48hr, fluid balance within the 48 hours after ICU admission; FB-fir24hr, fluid balance within the first 24 hours after ICU admission; ICU, intensive care unit; FB-sec24hr fluid balance within the second 24 hours (25 to 48 hours) after ICU admission; SOFA, sequential organ failure assessment.
